# Supplementary material
Source: Springer Nature journal article supplement (https://www.springermedizin.de/resource/supplementary/12888_2012_1450_MOESM2_ESM.pdf/9480158)

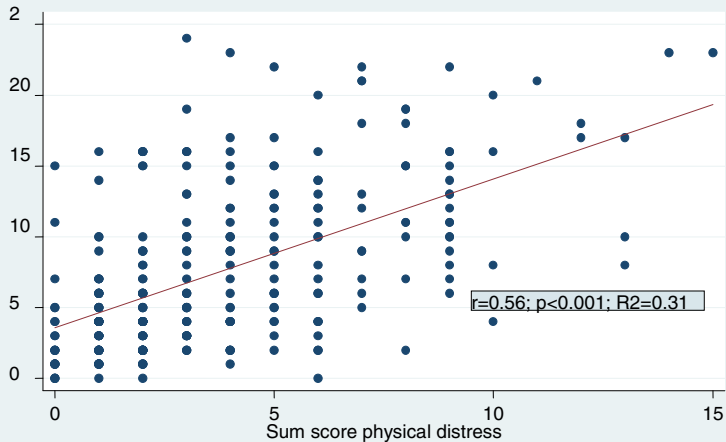

● Sum score psychological distress

— Fitted values

Supplement: MOESM2 [file 9480158]
